# Supplementary material
Source: HighWire-hosted journal article supplement (https://bmjopen.bmj.com/content/11/12/e052092)
Supplement: inline-supplementary-material-1 [file inline-supplementary-material-1.pdf]

**Supplementary Table 1. Coding frameworks**

*Questions 1: When you hear the term [one of the six labels], what words or feelings does this make you think of?*

| <b>Code</b>                  | <b>Explanation</b>                                                            | <b>Examples</b>                                                                            |
|------------------------------|-------------------------------------------------------------------------------|--------------------------------------------------------------------------------------------|
| Activity restriction         | Any reference to being unable to do typical daily activities                  | Caution, light work, rest, sleep loss, time off work, careful                              |
| Aging                        | Any reference to the condition being due to aging                             | Old, getting old/older, ancient                                                            |
| Psychological distress       | Any reference to feelings of fear, anxiety, worry or stress                   | Fear, anxious, worry, stress, scared, depressed, nervous, etc.                             |
| Feels dismissed              | Any reference to feeling dismissed by another person                          | Not interested in my opinion, not bad to those who don't suffer from it, not real, made up |
| Good prognosis               | Any reference to the condition recovering either quickly or without treatment | Temporary, no treatment needed, heal over time                                             |
| Irrelevant response          | The response did not address the question                                     | "Nothing at all", "I don't really have any feelings"                                       |
| Mechanism of injury          | Any reference to why the pain started                                         | Injury, overuse issue, caused by lifting, sports injury                                    |
| Minor issue                  | Any reference to the condition being 'non-serious'                            | Not serious, everyday issue, common, annoyance, uncomfortable, inconvenient                |
| Pain experience              | Any reference to pain                                                         | Pain, hurt, intermittent, discomfort, recurrent                                            |
| Poor prognosis               | Any reference to the condition taking a long time to recover                  | Persistent pain, long recovery, long-term issue                                            |
| Serious issue                | Any reference to the condition being 'serious'                                | Deteriorating, serious, bad, very ill                                                      |
| Tissue damage or dysfunction | Any reference to tissue damage or dysfunction                                 | Tendon tear, arm out of place, sprained ligaments, pulled muscle, stiffness, weakness      |
| Treatment/investigation      | Any reference to the need for treatment or investigation                      | Rest, pain medication, heat, surgery, physiotherapy, requires imaging                      |
| Uncertainty                  | Any reference to being unsure what the label means                            | Complicated, confused, uncertainty, need more information                                  |
| Unhappy/frustration          | Any reference to being unhappy or frustrated                                  | Sad, anger, annoyed, feel bad, upset, helpless, useless                                    |

Question 2: What treatment (s) (if any) do you think a person with [one of the six labels] needs?

| Code                          | Examples (if needed)                                                    |
|-------------------------------|-------------------------------------------------------------------------|
| Activity modification         | Avoid lifting, avoid aggravating activities, avoid strenuous activities |
| Acupuncture                   |                                                                         |
| Chiropractor                  |                                                                         |
| Cognitive behavioural therapy |                                                                         |
| Cold                          |                                                                         |
| Compression                   |                                                                         |
| Diet                          |                                                                         |
| Doctor                        |                                                                         |
| Electrotherapy                | Laser, ultrasound                                                       |
| Elevation                     |                                                                         |
| Emergency department/hospital |                                                                         |
| Ergonomics/posture            | Adjust computer screen height                                           |
| Exercise                      |                                                                         |
| Good mattress                 |                                                                         |
| Heat                          |                                                                         |
| Hydrotherapy                  |                                                                         |
| Immobilisation                | Sling                                                                   |
| Injection                     | Cortisone injection                                                     |
| Investigations                | X-ray, ultrasound, MRI                                                  |
| Light exercise                | Gentle exercise, exercise but be careful                                |
| Manipulation                  |                                                                         |
| Massage                       |                                                                         |
| Medication                    | Panadol, anti-inflammatories, muscle relaxants, supplements             |
| Irrelevant response           |                                                                         |
| Natural or unknown therapies  | Stone therapy, finger therapy, natural remedies, tea, spa baths         |
| No treatment                  | Time, patience, will heal itself in time                                |
| Normal movements              | Keep arm moving, normal activity, stay active                           |
| Osteopathy                    |                                                                         |
| Pain clinic                   |                                                                         |
| Physiotherapy                 |                                                                         |
| Prayer/hope/meditation        |                                                                         |
| Rest                          | Taking it easy, relaxation, reduce overall activity                     |
| Second opinion                |                                                                         |
| Specialist                    |                                                                         |
| Stay healthy                  | Good sleep, avoid smoking                                               |
| Surgery                       |                                                                         |
| Taping/bracing                | Brace, strapping                                                        |
| Time off work                 |                                                                         |

|                    |                                   |
|--------------------|-----------------------------------|
| Topical treatments | Ointment, rub, Voltaren gel, oils |
| Unsure             |                                   |
| Wait and see       |                                   |
