# Supplementary material
Source: HighWire-hosted journal article supplement (https://bmjopen.bmj.com/content/11/12/e052092)
Supplement: inline-supplementary-material-2 [file inline-supplementary-material-2.pdf]

Supplementary Table 2. Number of responses, codes, percent exact agreement and Kappa (95% Confidence Interval) for the level of agreement between reviews for coding a random sample of responses

| <b>Feelings about label</b>        | <b>N (%)</b> | <b>Codes</b> | <b>Agreement</b> | <b>k</b> | <b>95% CI</b> |
|------------------------------------|--------------|--------------|------------------|----------|---------------|
| All labels                         | 300 (22.9)   | 562          | 93.9%            | 0.93     | 0.90-0.95     |
| Subacromial impingement syndrome   | 50 (23.4)    | 90           | 94.3%            | 0.93     | 0.86-0.98     |
| Rotator cuff tear                  | 50 (23.8)    | 96           | 91.6%            | 0.90     | 0.82-0.97     |
| Bursitis                           | 50 (22.2)    | 86           | 93.3%            | 0.92     | 0.84-0.98     |
| Rotator-cuff-related shoulder pain | 50 (22.9)    | 87           | 97.3%            | 0.97     | 0.91-1.00     |
| Shoulder sprain                    | 50 (23.0)    | 111          | 93.8%            | 0.92     | 0.86-0.98     |
| Episode of shoulder pain           | 50 (22.3)    | 92           | 93.3%            | 0.92     | 0.85-0.98     |
| <b>Treatment for label</b>         | <b>N (%)</b> | <b>Codes</b> | <b>Agreement</b> | <b>k</b> | <b>95% CI</b> |
| All labels                         | 300 (22.9)   | 586          | 94.4%            | 0.94     | 0.92-0.96     |
| Subacromial impingement syndrome   | 50 (23.4)    | 94           | 93.3%            | 0.93     | 0.87-0.98     |
| Rotator cuff tear                  | 50 (23.8)    | 99           | 94.7%            | 0.94     | 0.88-0.99     |
| Bursitis                           | 50 (22.2)    | 89           | 97.8%            | 0.97     | 0.94-1.00     |
| Rotator-cuff-related shoulder pain | 50 (22.9)    | 93           | 95.7%            | 0.95     | 0.90-0.99     |
| Shoulder sprain                    | 50 (23.0)    | 108          | 93.9%            | 0.93     | 0.88-0.98     |
| Episode of shoulder pain           | 50 (22.3)    | 103          | 92.0%            | 0.91     | 0.85-0.97     |

N: number of responses coded; k: kappa coefficient; CI: confidence interval.
